# Supplementary material for: Density functional study on the effect of a new ladder-type structure with different substituent groups (R = H, CH3, OCH3and CN) for donor–acceptor copolymers
Source: Royal Society of Chemistry journal article supplement (doi:10.1039/c4ra05954a), 2014-08-07
Supplement: c4ra05954a1.pdf [file c4ra05954a1.pdf]

## **Supporting Information**

### **Density Functional Study on the Effect of a New Ladder-type Structure with Different Substituent Groups (R = H, CH<sub>3</sub>, OCH<sub>3</sub> and CN) for Donor-Acceptor Copolymers**

**Zhiyong Fu, Wei Shen, Rongxing He, Xiaorui Liu, Pei Yu, Xian Peng, Ming Li\***

College of Chemistry and Chemical Engineering, Southwest University, Chongqing  
400715, China

---

\* To whom correspondence should be addressed. E-mail: liming@swu.edu.cn

**Table S1** HOMO energy (in eV),  $\Delta E_{\text{LU-HO}}$  (in eV), absorption peaks:  $\lambda$  (in nm) and vertical transition energies of  $S_0 \rightarrow S_1$ :  $E_{\text{g,TD}}$  (in eV) of P1 obtained in the gas phase with PBE0, B3LYP and BHandHLYP methods at 6-31G\*\* basis set.

| Method         | Oligomer | HOMO  | $\Delta E_{\text{LU-HO}}$ | $\lambda$  | $E_{\text{g,TD}}$ | HOMO <sup>a</sup> | $\lambda^a$ |
|----------------|----------|-------|---------------------------|------------|-------------------|-------------------|-------------|
| PBE0           | M1       | -5.22 | 2.64                      | 566        | 2.19              | -5.40             | 625         |
|                |          |       |                           | 381        |                   |                   | 425         |
|                | D1       | -5.05 | 2.35                      | 649<br>426 | 1.91              |                   |             |
| B3LYP          | M1       | -4.99 | 2.33                      | 612        | 2.02              |                   |             |
|                |          |       |                           | 401        |                   |                   |             |
|                | D1       | -4.82 | 2.04                      | 708<br>456 | 1.75              |                   |             |
| BHand<br>-HLYP | M1       | -5.92 | 4.26                      | 447        | 2.77              |                   |             |
|                |          |       |                           | 314        |                   |                   |             |
|                | D1       | -5.74 | 3.96                      | 483<br>329 | 2.56              |                   |             |

<sup>a</sup>experimental values (from reference15) “M” and “D” denote monomer and dimer, respectively.

**Table S2** The calculated NBO charge of the corresponding electron-deficient units for those monomers (M1-M3, M2a-M2c and M2a' -M2c' ) at PBE0/6-311G\*\* level are listed in the table. “**M**” means monomer.

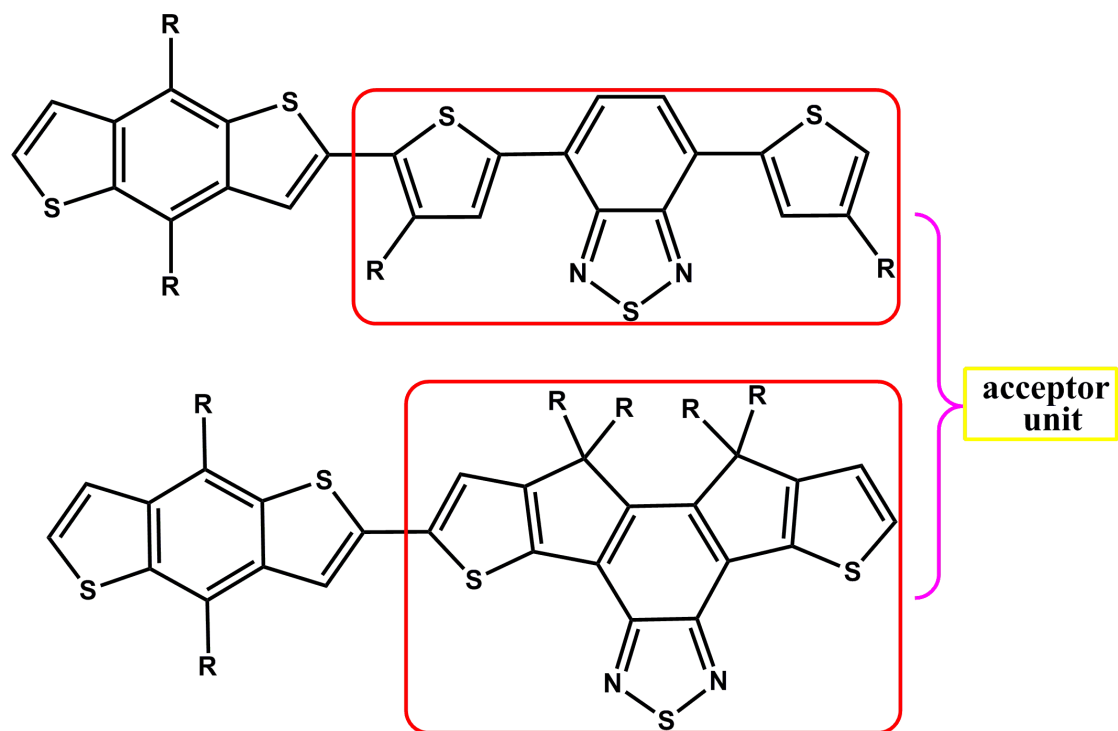

|                     | M1    | M2    | M2a   | M2b   | M2c    | M2a'  | M2b'   | M2c'   | M3     |
|---------------------|-------|-------|-------|-------|--------|-------|--------|--------|--------|
| Charge <sup>a</sup> | 0.012 | 0.017 | 0.019 | 0.002 | -0.010 | 0.005 | -0.007 | -0.016 | -0.039 |

<sup>a</sup> The values of charge from positive to negative denote that the electron-withdrawing ability of the electron-deficient units strengthen gradually.

Table S3 Calculated HOMO energies (eV) and electronic transitions of oligomers (monomer (M), dimer (D) and trimer (T)) obtained in the gas phase with PBE0 methods at 6-311G\*\* basis set.

| Oligomer | Excitation energy<br>(eV and nm) |     | HOMO  |
|----------|----------------------------------|-----|-------|
| M1       | 2.20                             | 563 | -5.40 |
|          | 3.36                             | 369 |       |
| D1       | 1.95                             | 636 | -5.24 |
|          | 2.95                             | 420 |       |
| T1       | 1.86                             | 667 | -5.20 |
|          | 2.90                             | 427 |       |

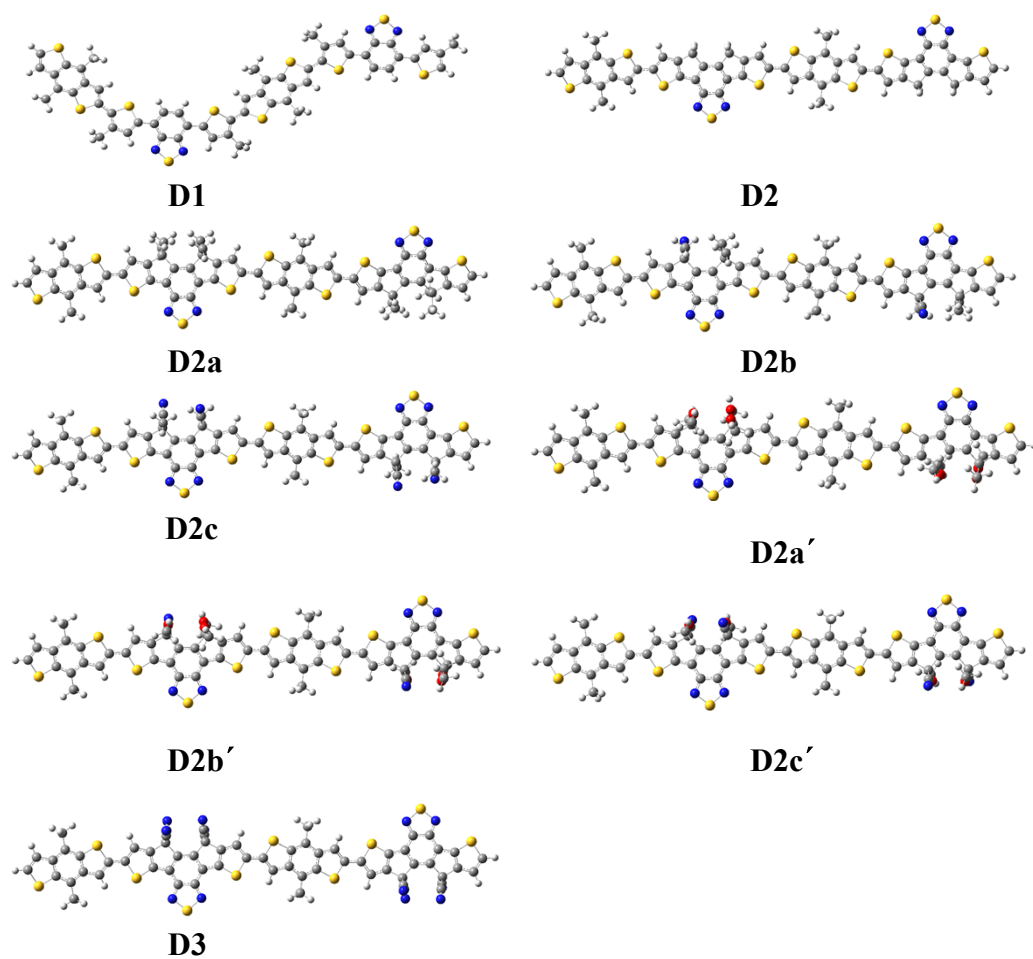

**Fig. S1** The optimized geometries of all investigated monomers calculated at PBE0/6-311G\*\*level. Color code: yellow (S), blue (N), black (C), red (O) and grey (H). In molecular structures, the alkyl (alkoxy) group has been replaced with methyl (methoxyl).

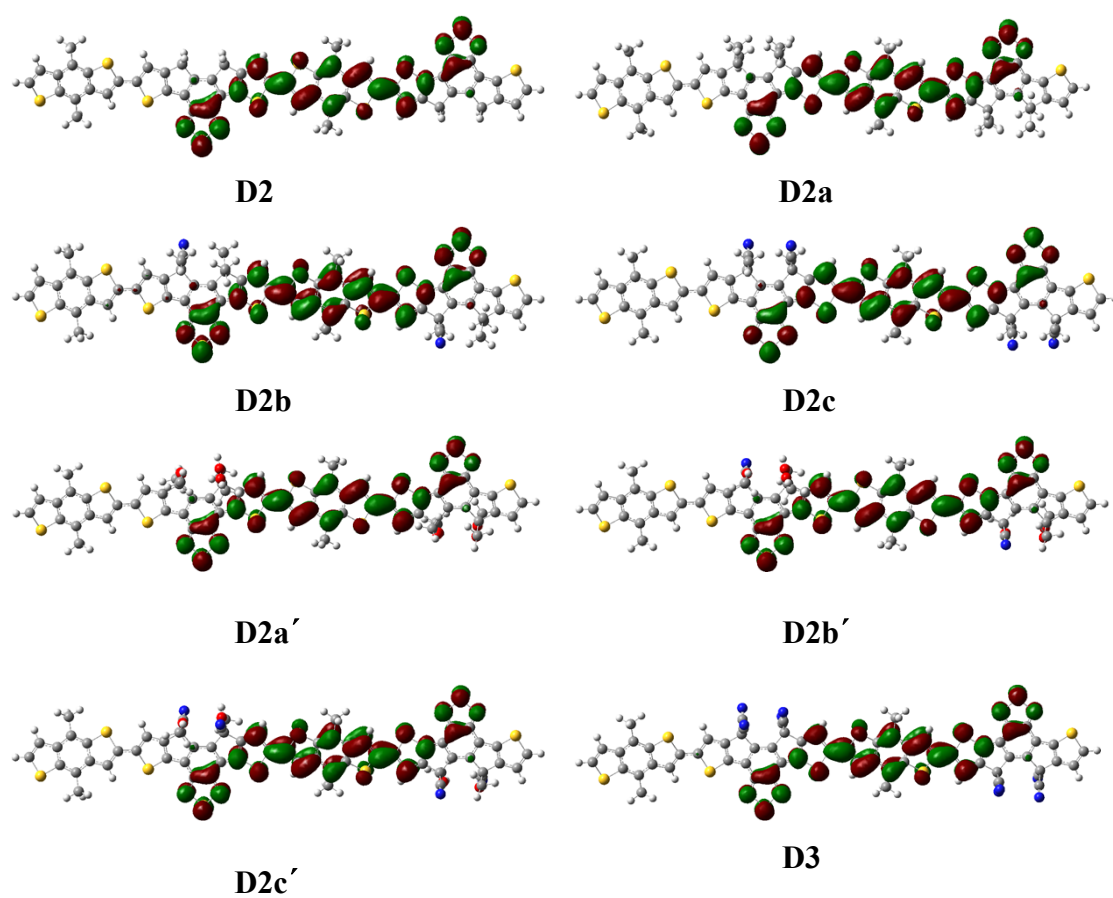

**Fig. S2** Electron density plots of LUMO+2 for all the dimers (P2, P2a-P2c, P2a'-P2c' and P3) computed at PBE0/6-311G\*\* level.
